# Supplementary material for: Natural Urease Inhibitors Reduce the Severity of Disease Symptoms, Dependent on the Lifestyle of the Pathogens
Source: MDPI journal article supplement (doi:10.3390/jof9070708), 2023-06-28
Supplement: s1 [file s1]

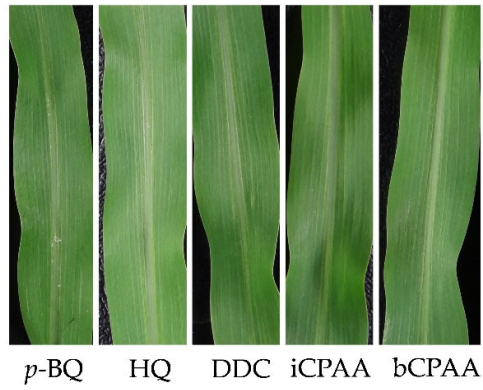

**Figure S1.** Analysis of phytotoxicity of urease inhibitors using spray application of 10 mM solutions of *p*-BQ, HQ, DDC, iCPAA, and bCPAA, respectively. Photographs were taken at 5 dpt.

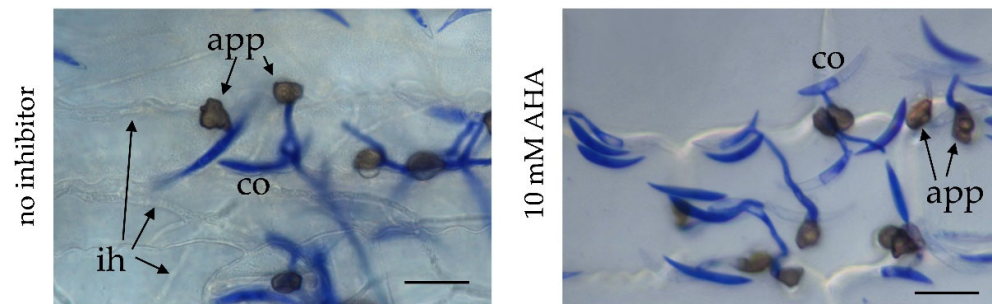

**Figure S2.** Microscopy of *C. graminicola* on detached maize leaves at 48 hpi. Maize leaves were inoculated with the WT strain CgM2. Ten  $\mu$ l of a conidial suspension containing  $10^6$  spores/ml and 0.02% (v/v) Tween 20, with or without 10 mM of the urease inhibitor AHA were inoculated onto the intact leaf surface. co, conidia; app, appressoria; ih, infection hyphae. Prior to microscopy, 0.01% (v/v) Aniline blue was applied to leaves to discriminate structures formed on the plant surface (co; app, in blue) from those formed in the plant (ih). Size bar = 20  $\mu$ m.
